# Supplementary material for: Toward a stabilized lattice framework and surface structure of layered lithium-rich cathode materials with Ti modification
Source: Royal Society of Chemistry journal article supplement (doi:10.1039/c5cp00853k), 2015-01-01
Supplement: c5cp00853k1.pdf [file c5cp00853k1.pdf]

## **Toward a stabilized lattice framework and surface structure of layered lithium-rich cathode materials with Ti modification**

Sihui Wang,<sup>a,b</sup> Yixiao Li,<sup>a</sup> Jue Wu,<sup>a</sup> Bizhu Zheng,<sup>a</sup> Matthew J

McDonald,<sup>a</sup> and Yong Yang\*<sup>a,c</sup>

<sup>a</sup> *State Key Laboratory of Physical Chemistry of Solid Surfaces, and Department of Chemistry, College of Chemistry and Chemical Engineering, Xiamen University, Xiamen 361005, PR China. Fax: +86-592-2185753, Tel: +86-592-2185753, E-mail: [yyang@xmu.edu.cn](mailto:yyang@xmu.edu.cn)*

<sup>b</sup> *Tianjin Institute of Power Sources, Tianjin 300384, PR China*

<sup>c</sup> *School of Energy Research, Xiamen University, Xiamen 361005, PR China*

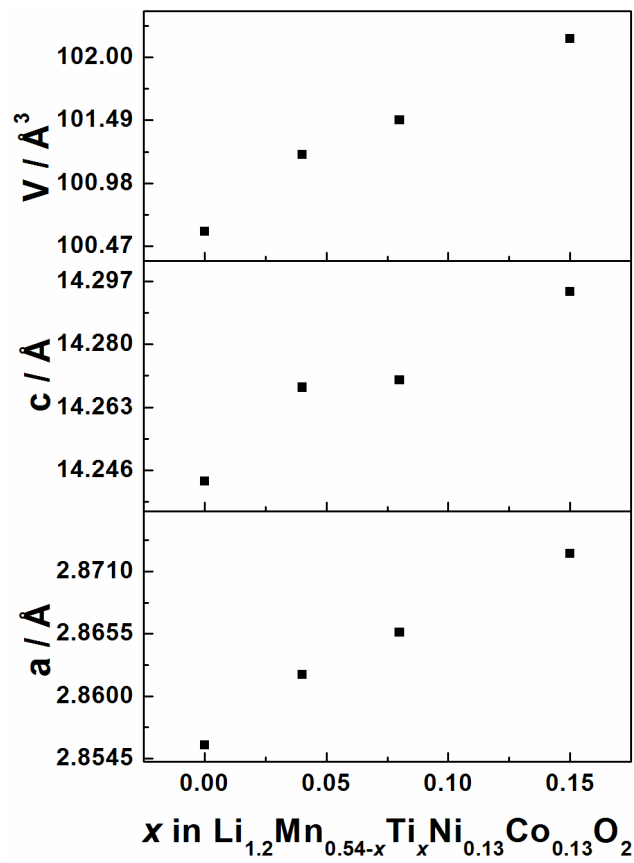

**Figure. S1** Variations of lattice parameters and volume of  $\text{Li}_{1.2}\text{Mn}_{0.54-x}\text{Ti}_x\text{Ni}_{0.13}\text{Co}_{0.13}\text{O}_2$  ( $x=0, 0.04, 0.08, \text{ and } 0.15$ ) with respect to Ti content.

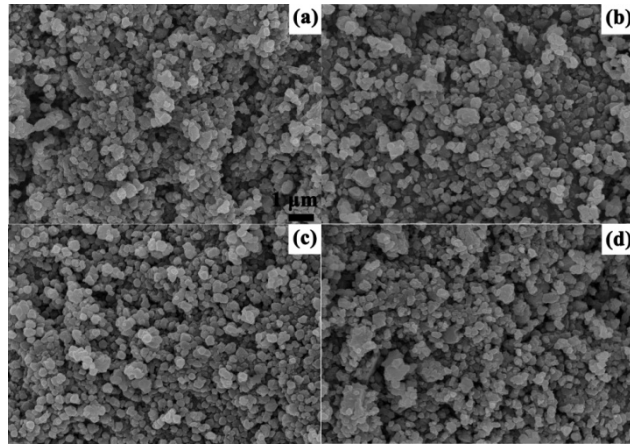

**Figure. S2** SEM images of  $\text{Li}_{1.2}\text{Mn}_{0.54-x}\text{Ti}_x\text{Ni}_{0.13}\text{Co}_{0.13}\text{O}_2$ . (a)  $x = 0$ , (b)  $x = 0.04$ , (c)  $x = 0.08$ , and (d)  $x = 0.15$ .

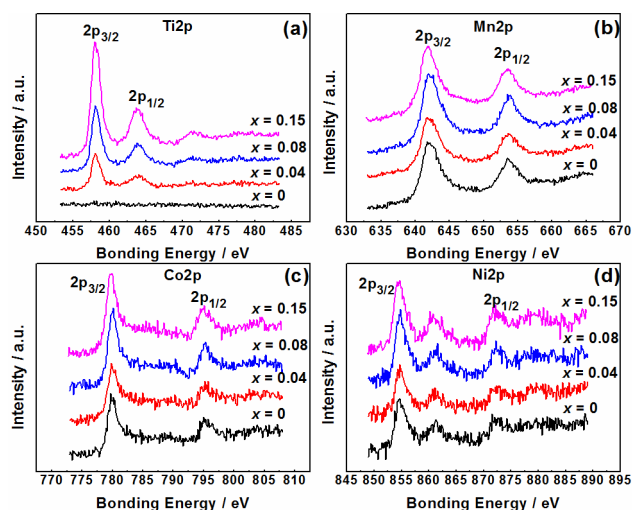

**Figure. S3** XPS spectra of transition metals in  $\text{Li}_{1.2}\text{Mn}_{0.54-x}\text{Ti}_x\text{Ni}_{0.13}\text{Co}_{0.13}\text{O}_2$ : (a) Ti 2p, (b) Mn 2p, (c) Co 2p, and (d) Ni 2p spectra.

In Fig. S3 (a),  $\text{Li}_{1.2}\text{Mn}_{0.54}\text{Ni}_{0.13}\text{Co}_{0.13}\text{O}_2$  does not show any peak in the Ti 2p spectrum. Peak intensity of the Ti 2p spectrum gradually increases with increasing Ti content. The bonding energies of Ti  $2p_{3/2}$  and Ti  $2p_{1/2}$  are 458.1 eV and 463.9 eV, respectively, suggesting that the valency of Ti in the Ti-substituted materials is +4.<sup>1, 2</sup> After Ti substitution, no obvious peak shifting of  $2p_{3/2}$  and  $2p_{1/2}$  peaks for Mn 2p, Co 2p and Ni 2p spectrum are observed (Fig. S3 (b)-(d)), and the bonding energies of Mn  $2p_{3/2}$ , Mn  $2p_{1/2}$ , Co  $2p_{3/2}$ , Co  $2p_{1/2}$ , Ni  $2p_{3/2}$  and Ni  $2p_{1/2}$  are 642.1 eV, 653.6 eV, 779.9 eV, 795.2 eV, 854.6 eV, and 872.5 eV, respectively. According to the literature,<sup>3-5</sup> the transition metal ions are in the state of  $\text{Mn}^{4+}$ ,  $\text{Co}^{3+}$  and  $\text{Ni}^{2+}$  in all these materials, indicating that the equivalent  $\text{Ti}^{4+}$  substitution for partial  $\text{Mn}^{4+}$  does not affect the valencies of the other ions.

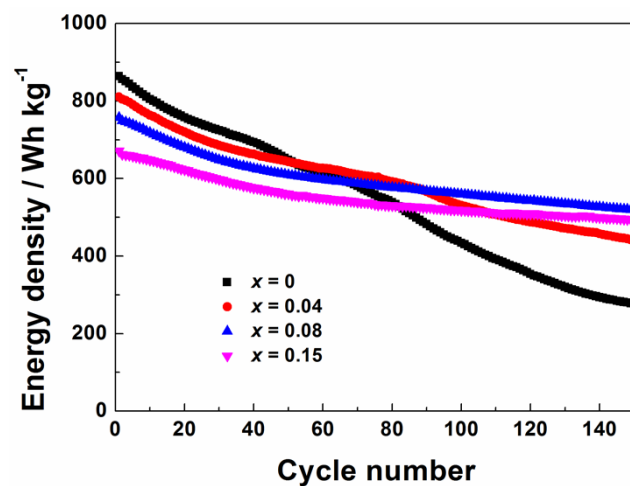

**Figure. S4** Energy density of  $\text{Li}_{1.2}\text{Mn}_{0.54-x}\text{Ti}_x\text{Ni}_{0.13}\text{Co}_{0.13}\text{O}_2$  ( $x=0, 0.04, 0.08,$  and  $0.15$ ) materials cycled at a current density of  $200 \text{ mA g}^{-1}$ .

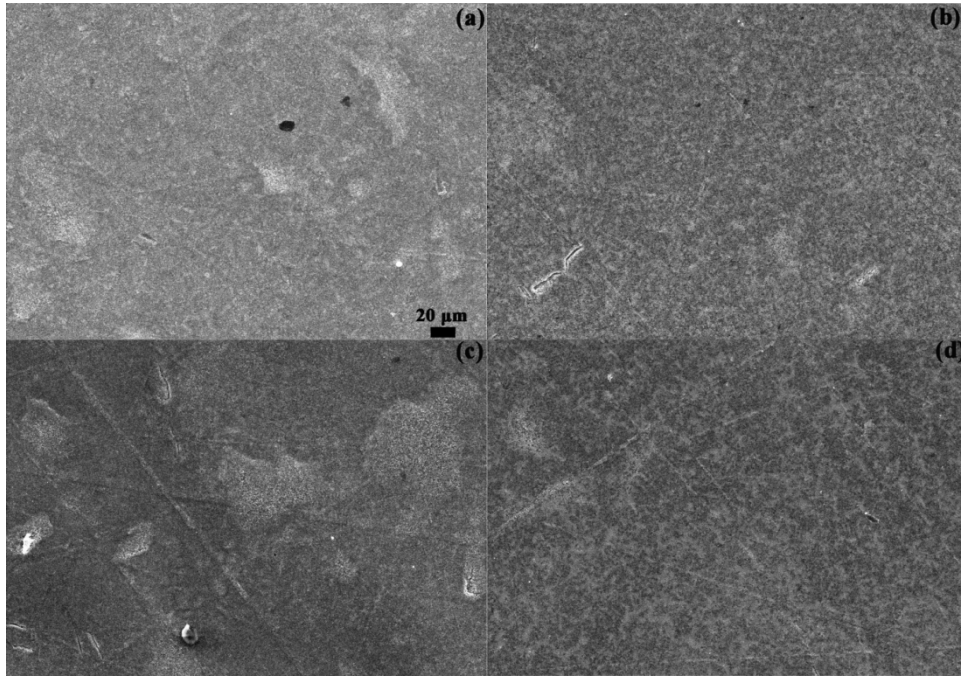

**Figure. S5** SEM images of  $\text{Li}_{1.2}\text{Mn}_{0.54-x}\text{Ti}_x\text{Ni}_{0.13}\text{Co}_{0.13}\text{O}_2$  electrodes after 100 cycles at a current density of  $200 \text{ mA g}^{-1}$ . (a)  $x = 0$ , (b)  $x = 0.04$ , (c)  $x = 0.08$ , (d)  $x = 0.15$ .

**Table S1.** Chemical composition results of ICP-AES analysis for  $\text{Li}_{1.2}\text{Mn}_{0.54-x}\text{Ti}_x\text{Ni}_{0.13}\text{Co}_{0.13}\text{O}_2$  ( $x=0, 0.04, 0.08, \text{ and } 0.15$ ).

| Theoretical stoichiometry | Measured stoichiometry from ICP-AES |      |      |      |      |
|---------------------------|-------------------------------------|------|------|------|------|
|                           | Li                                  | Ni   | Co   | Mn   | Ti   |
| $x = 0$                   | 1.15                                | 0.12 | 0.13 | 0.52 | -    |
| $x = 0.04$                | 1.23                                | 0.13 | 0.14 | 0.50 | 0.04 |
| $x = 0.08$                | 1.22                                | 0.12 | 0.13 | 0.44 | 0.08 |
| $x = 0.15$                | 1.15                                | 0.12 | 0.13 | 0.39 | 0.16 |

**Table S2.** Fitting data of  $R_{sf}$  and  $R_{ct}$  for  $\text{Li}_{1.2}\text{Mn}_{0.54-x}\text{Ti}_x\text{Ni}_{0.13}\text{Co}_{0.13}\text{O}_2$ .

|       | $R_{sf} / \Omega$ |            |            |            | $R_{ct} / \Omega$ |            |            |            |
|-------|-------------------|------------|------------|------------|-------------------|------------|------------|------------|
|       | $x = 0$           | $x = 0.04$ | $x = 0.08$ | $x = 0.15$ | $x = 0$           | $x = 0.04$ | $x = 0.08$ | $x = 0.15$ |
| 2nd   | 2.6               | 3.2        | 3.7        | 3.9        | 21.4              | 37.9       | 66.8       | 94.8       |
| 100th | 11.4              | 0.4        | 1.0        | 1.2        | 373.2             | 264.1      | 413.9      | 985.7      |
| 150th | 32.9              | 2.7        | 1.8        | 0.8        | 716.6             | 363.7      | 544.6      | 1047       |

1. S. Wang, J. Yang, X. Wu, Y. Li, Z. Gong, W. Wen, M. Lin, J. Yang and Y. Yang, *J. Power Sources*, 2014, 245, 570-578.
2. H. G. Yang and H. C. Zeng, *The Journal of Physical Chemistry B*, 2004, 108, 3492-3495.
3. L. Li, X. Zhang, R. Chen, T. Zhao, J. Lu, F. Wu and K. Amine, *J. Power Sources*, 2014, 249, 28-34.
4. G. Singh, R. Thomas, A. Kumar, R. S. Katiyar and A. Manivannan, *J. Electrochem. Soc.*, 2012, 159, A470-A478.
5. D. Luo, G. Li, X. Guan, C. Yu, J. Zheng, X. Zhang and L. Li, *Journal of Materials Chemistry A*, 2013, 1, 1220-1227.
